# Supplementary material
Source: PubMed Central journal article supplement (PMC7893290)
Supplement: mmc1.pdf [file mmc1.pdf]

**Associated content. Table 1.** Coordinates of restricted areas (grid boxes) in Dockthor and Autodock Vina software

| Protein              | Axis |     |     |
|----------------------|------|-----|-----|
|                      | X    | Y   | Z   |
| Protein Spike Open   | 200  | 225 | 250 |
| Protein Spike Closed | 210  | 213 | 255 |
| RBD                  | -27  | 22  | 26  |
| Mpro                 | -20  | 23  | 66  |
| NSP 10               | 75   | 3   | 4   |
| NSP 16               | 87   | 16  | 17  |
| Polymerase           | -7   | 30  | -30 |

**Associated content. Table 2.** Drug and viral interaction proteins.

| Drugs                | Viral protein                    |
|----------------------|----------------------------------|
| abacavir             | Polymerase                       |
| adefovir             | Polymerase                       |
| amprenavir           | Main protease                    |
| atazanavir           | Main protease                    |
| daclastavir          | Non structural protein 10 and 16 |
| darunavir            | Main protease                    |
| didanosine           | Polymerase                       |
| dolutegravir         | Spike protein                    |
| efavirenz            | Polymerase                       |
| emtricitabine        | Polymerase                       |
| enfuvirtide          | Spike protein                    |
| entecavir            | Polymerase                       |
| Primaquine phosphate | Spike protein                    |
| galidesivir          | Polymerase                       |
| indinavir            | Main protease                    |
| lamivudine           | Polymerase                       |
| lopinavir            | Main protease                    |
| nelfinavir           | Main protease                    |
| nevirapine           | Polymerase                       |
| raltegravir          | Spike protein                    |
| ribavirin            | Polymerase                       |
| saquinavir           | Main protease                    |
| simeprevir           | Main protease                    |
| sofosbuvir           | Polymerase                       |

|                 |               |
|-----------------|---------------|
| stavudine       | Polymerase    |
| Quinine sulfate | Spike protein |
| Tenofovir       | polymerase    |
| tipranavir      | Main protease |
| veruprevir      | Main protease |
| zanamivir       | Spike protein |
| zidovudin       | polymerase    |
| Arbidol         | Spike protein |
| Camostat        | Main protease |
| Crysin          | Main protease |
| Emodin          | Spike protein |
| Favipiravir     | Polymerase    |
| nFCCI3          | Spike protein |
| Niclosamine     | Spike protein |
| Oseltamivir     | Spike protein |
| Ganciclovir     | Spike protein |
| Penciclovir     | polymerase    |
| Phaitanthrin D  | All           |
| Remdesivir      | Spike protein |
| Sovalvi         | Spike protein |
| SSAA09E2        | Spike protein |
| Umefenovir      | Spike protein |

**Associated content. Table 3.** Results of Molecular Docking.

| Drug         | Viral Protein        | Platform      | Affinity (Kcal/mol) | glob   | TVdW   | ACE    | inside | H-bonds | S L/L  | S H/H  | S buried | Stotal  | Match 1 |
|--------------|----------------------|---------------|---------------------|--------|--------|--------|--------|---------|--------|--------|----------|---------|---------|
| Dolutegravir | RBD                  | DockThor      |                     | 17630  | -20978 |        |        | 1.44    | 55.19  | 50.19  | 193.67   | 319.22  | 0.3301  |
| Dolutegravir | RBD                  | PatchDock     |                     | -43,96 | -18,19 | -9,49  | 0,45   | 1.25    | 21.90  | 67.85  | 245.63   | 325.96  | 0.2753  |
| Dolutegravir | RBD                  | Autodock Vina | -8.1                |        |        |        |        | 0.19    | 27.78  | 60.82  | 204.43   | 330.12  | 0.2684  |
| Dolutegravir | Protein Spike Open   | DockThor      |                     | 18470  | -16882 |        |        | 0,52    | 14,62  | 51,77  | 154,62   | 325,76  | 0,2038  |
| Dolutegravir | Protein Spike Open   | PatchDock     |                     | -51,76 | -14,11 | -16,66 | 0,19   | 0.01    | 37.02  | 68.29  | 286.83   | 325.62  | 0.3234  |
| Dolutegravir | Protein Spike Open   | Autodock Vina | -7.5                |        |        |        |        | 0.35    | 21.14  | 42.40  | 189.55   | 330.31  | 0.1924  |
| Dolutegravir | Protein Spike Closed | DockThor      |                     | 18110  | -19795 |        |        | 1.70    | 37.28  | 45.00  | 174.05   | 321.83  | 0.2557  |
| Dolutegravir | Protein Spike Closed | PatchDock     |                     | -41,29 | -19,35 | -5,98  | 0,5    | 0.71    | 14.37  | 88.42  | 261.01   | 325.13  | 0.3162  |
| Dolutegravir | Protein Spike Closed | Autodock Vina | -9.5                |        |        |        |        | 2.11    | 13.23  | 73.67  | 266.39   | 332.02  | 0.2617  |
| Enfuvirtide  | RBD                  | DockThor      |                     |        |        |        |        |         |        |        |          |         |         |
| Enfuvirtide  | RBD                  | PatchDock     |                     | -5,61  | -5,07  | -3,1   | 11,94  | 0.00    | 0.00   | 4.24   | 49.68    | 3121.46 | 0.0014  |
| Enfuvirtide  | RBD                  | Autodock Vina | -17.1               |        |        |        |        | 1.24    | 2.91   | 284.05 | 482.65   | 3171.46 | 0.0905  |
| Enfuvirtide  | Protein Spike Open   | DockThor      |                     |        |        |        |        |         |        |        |          |         |         |
| Enfuvirtide  | Protein Spike Open   | PatchDock     |                     | -10,78 | -3,54  | -3,44  | 1,28   | 0.92    | 0.00   | 45.00  | 90.19    | 3111.78 | 0.0145  |
| Enfuvirtide  | Protein Spike Open   | Autodock Vina | -17.2               |        |        |        |        | 1.40    | 21.46  | 279.93 | 442.78   | 3181.47 | 0.0947  |
| Enfuvirtide  | Protein Spike Closed | DockThor      |                     |        |        |        |        |         |        |        |          |         |         |
| Enfuvirtide  | Protein Spike Closed | PatchDock     |                     | -3,94  | -1,54  | -1,35  | 0,81   | 5.15    | 112.28 | 900.81 | 1432.00  | 3127.23 | 0.324   |
| Enfuvirtide  | Protein Spike Closed | Autodock Vina | -16.9               |        |        |        |        | 3.97    | 105.19 | 277.97 | 475.62   | 3166.90 | 0.121   |
| Raltegravir  | RBD                  | DockThor      |                     | 75454  | -19225 |        |        | 0.14    | 14.11  | 117.59 | 182.02   | 375.11  | 0.3511  |
| Raltegravir  | RBD                  | PatchDock     |                     | -45,02 | -20,9  | -7,54  | 1,88   | 0.40    | 46.58  | 84.05  | 245.57   | 362.28  | 0.3606  |
| Raltegravir  | RBD                  | Autodock Vina | -6.8                |        |        |        |        | 2.15    | 34.87  | 61.58  | 203.54   | 369.93  | 0.2607  |
| Raltegravir  | Protein Spike Open   | DockThor      |                     | 76698  | -20352 |        |        | 0.31    | 19.24  | 117.53 | 201.39   | 380.74  | 0.3592  |
| Raltegravir  | Protein Spike Open   | PatchDock     |                     | -51,64 | -12,7  | -18,02 | 0,49   | 1.81    | 30.95  | 95.76  | 276.45   | 361.21  | 0.3508  |
| Raltegravir  | Protein Spike Open   | Autodock Vina | -8.7                |        |        |        |        | 2.39    | 36.77  | 92.72  | 246.96   | 358.16  | 0.3615  |
| Raltegravir  | Protein Spike Closed | DockThor      |                     | 75032  | -13074 |        |        | 2.88    | 10.82  | 98.92  | 184.68   | 377.65  | 0.2906  |

|             |                      |               |      |        |        |        |      |      |       |        |        |        |        |
|-------------|----------------------|---------------|------|--------|--------|--------|------|------|-------|--------|--------|--------|--------|
| Raltegravir | Protein Spike Closed | PatchDock     |      | -52,98 | -17,57 | -14,25 | 0,34 | 0.59 | 50.70 | 103.04 | 312.21 | 362.47 | 0.4241 |
| Raltegravir | Protein Spike Closed | Autodock Vina | -6.9 |        |        |        |      | 0.83 | 61.26 | 69.43  | 191.83 | 376.32 | 0.3473 |
| Zanamivir   | RBD                  | DockThor      |      | -19546 | 0.149  |        |      | 2.77 | 0.00  | 108.42 | 108.42 | 294.43 | 0.3682 |
| Zanamivir   | RBD                  | PatchDock     |      | -33,32 | -11,77 | -8,06  | 1,53 | 1.83 | 0.00  | 186.71 | 242.27 | 294.62 | 0.6337 |
| Zanamivir   | RBD                  | Autodock Vina | -6.7 |        |        |        |      | 4.67 | 0.00  | 186.20 | 245.63 | 308.16 | 0.6042 |
| Zanamivir   | Protein Spike Open   | DockThor      |      | -23254 | -10800 |        |      | 0.94 | 0.00  | 158.41 | 171.20 | 298.15 | 0.5313 |
| Zanamivir   | Protein Spike Open   | PatchDock     |      | -41,55 | -12,16 | -13,63 | 0,24 | 0.96 | 0.00  | 196.96 | 254.24 | 296.64 | 0.664  |
| Zanamivir   | Protein Spike Open   | Autodock Vina | -6.7 |        |        |        |      | 4.89 | 0.00  | 196.71 | 228.29 | 293.29 | 0.6707 |
| Zanamivir   | Protein Spike Closed | DockThor      |      | -22346 | -1143  |        |      | 2.75 | 0.00  | 115.38 | 151.83 | 297.15 | 0.3883 |
| Zanamivir   | Protein Spike Closed | PatchDock     |      | -38,59 | -14,35 | -9,88  | 0,3  | 1.50 | 0.00  | 180.44 | 264.11 | 296.07 | 0.6095 |
| Zanamivir   | Protein Spike Closed | Autodock Vina | -6.4 |        |        |        |      | 2.36 | 0.00  | 160.57 | 203.48 | 307.40 | 0.5223 |
| Daclastavir | NSP 10               | DockThor      |      | 2666   | -38447 |        |      | 0.98 | 11.33 | 106.39 | 317.59 | 676.82 | 0.1739 |
| Daclastavir | NSP 10               | PatchDock     |      | -63    | -21,57 | -16,91 | 2,88 | 0.00 | 6.01  | 89.24  | 313.60 | 623.72 | 0.1527 |
| Daclastavir | NSP 10               | Autodock Vina | -8.4 |        |        |        |      | 0.98 | 24.94 | 86.26  | 339.30 | 642.71 | 0.173  |
| Daclastavir | NSP 16               | DockThor      |      | 4273   | -27863 |        |      | 1.57 | 7.47  | 105.44 | 293.29 | 667.45 | 0.1692 |
| Daclastavir | NSP 16               | PatchDock     |      | -57,2  | -20,64 | -14,58 | 3,52 | 0.00 | 48.48 | 76.20  | 372.46 | 621.57 | 0.2006 |
| Daclastavir | NSP 16               | Autodock Vina | -9.0 |        |        |        |      | 0.00 | 49.24 | 43.73  | 243.35 | 672.58 | 0.1382 |
| Amprenavir  | Main Protease        | DockThor      |      | -7246  | -16268 |        |      | 3.29 | 2.28  | 76.58  | 182.78 | 460.05 | 0.1714 |
| Amprenavir  | Main Protease        | PatchDock     |      | -46,59 | -7,28  | -16,6  | 3,55 | 0.00 | 16.14 | 72.47  | 315.44 | 446.26 | 0.1986 |
| Amprenavir  | Main Protease        | Autodock Vina | -6.0 |        |        |        |      | 2.83 | 11.96 | 116.58 | 225.76 | 414.11 | 0.3104 |
| Atazanavir  | Main Protease        | DockThor      |      | 49045  | -20881 |        |      | 3.17 | 4.49  | 79.24  | 191.07 | 621.63 | 0.1347 |
| Atazanavir  | Main Protease        | PatchDock     |      | -48,81 | -14,27 | -13,23 | 3,61 | 0.67 | 34.49 | 69.30  | 211.89 | 610.44 | 0.17   |
| Atazanavir  | Main Protease        | Autodock Vina | -6.5 |        |        |        |      | 0.00 | 38.04 | 82.02  | 232.59 | 433.79 | 0.2768 |
| Darunavir   | Main Protease        | DockThor      |      | -5143  | -17889 |        |      | 1.96 | 1.39  | 71.14  | 189.05 | 482.45 | 0.1503 |
| Darunavir   | Main Protease        | PatchDock     |      | -51,33 | -16,88 | -16,47 | 3,5  | 0.34 | 37.97 | 111.33 | 356.51 | 501.19 | 0.2979 |
| Darunavir   | Main Protease        | Autodock Vina | -6,5 |        |        |        |      | 1.73 | 31.08 | 142.40 | 263.35 | 464.62 | 0.3734 |
| Etravirine  | Main Protease        | DockThor      | 16   | 12504  | -14232 |        |      | 1.96 | 1.39  | 71.14  | 189.05 | 482.45 | 0.1503 |
| Etravirine  | Main Protease        | PatchDock     |      | -43,27 | -16    | -12,31 | 3,24 | 1.88 | 16.58 | 132.72 | 268.60 | 355.63 | 0.4198 |
| Etravirine  | Main Protease        | Autodock Vina | -6.0 |        |        |        |      | 0.02 | 1.77  | 122.21 | 186.01 | 382.58 | 0.3241 |

|            |               |               |      |        |        |        |      |      |       |        |        |        |        |
|------------|---------------|---------------|------|--------|--------|--------|------|------|-------|--------|--------|--------|--------|
| Indinavir  | Main Protease | DockThor      |      | 98155  | -20266 |        |      | 2.23 | 3.73  | 88.23  | 189.36 | 555.49 | 0.1655 |
| Indinavir  | Main Protease | PatchDock     |      | -48,04 | -18,14 | -14,63 | 5,15 | 0.94 | 16.71 | 108.04 | 307.21 | 570.94 | 0.2185 |
| Indinavir  | Main Protease | Autodock Vina | -7.1 |        |        |        |      | 0.65 | 75.06 | 103.23 | 314.23 | 536.70 | 0.3322 |
| Lopinavir  | Main Protease | DockThor      |      | 31261  | -16998 |        |      | 1.95 | 11.71 | 50.13  | 188.79 | 532.14 | 0.1162 |
| Lopinavir  | Main Protease | PatchDock     |      | -53.13 | -10,86 | -17,88 | 3,94 | 0.14 | 21.27 | 77.09  | 341.32 | 531.89 | 0.1849 |
| Lopinavir  | Main Protease | Autodock Vina | -7.2 |        |        |        |      | 0.00 | 92.97 | 51.90  | 311.77 | 554.87 | 0.2611 |
| Nelfinavir | Main Protease | DockThor      |      | 59199  | -18636 |        |      | 0.98 | 22.15 | 33.73  | 178.92 | 510.17 | 0.1095 |
| Nelfinavir | Main Protease | PatchDock     |      | -50,62 | -13,31 | -16,82 | 4    | 0.00 | 21.39 | 48.92  | 322.78 | 508.40 | 0.1383 |
| Nelfinavir | Main Protease | Autodock Vina | -6.6 |        |        |        |      | 1.02 | 48.54 | 55.19  | 257.34 | 467.84 | 0.2217 |
| Ritonavir  | Main Protease | DockThor      |      | 5379   | -25079 |        |      | 2.42 | 4.75  | 51.26  | 226.83 | 569.23 | 0.0984 |
| Ritonavir  | Main Protease | PatchDock     |      | -54,65 | -15,68 | -18,86 | 7,01 | 1.00 | 56.20 | 46.90  | 304.74 | 583.98 | 0.1765 |
| Ritonavir  | Main Protease | Autodock Vina | -5.9 |        |        |        |      | 1.92 | 53.42 | 64.94  | 332.53 | 568.41 | 0.2082 |
| Saquinavir | Main Protease | DockThor      |      | 56193  | -17876 |        |      | 1.70 | 42.21 | 67.28  | 201.58 | 568.15 | 0.1927 |
| Saquinavir | Main Protease | PatchDock     |      | -46,84 | -13,89 | -12,26 | 2,83 | 0.74 | 2.85  | 95.69  | 345.69 | 535.56 | 0.184  |
| Saquinavir | Main Protease | Autodock Vina | -7.0 |        |        |        |      | 0.90 | 71.01 | 61.77  | 295.31 | 535.63 | 0.2479 |
| Simeprevir | Main Protease | DockThor      |      | 15364  | -23813 |        |      | 1.64 | 6.96  | 58.73  | 216.14 | 614.68 | 0.1069 |
| Simeprevir | Main Protease | PatchDock     |      | -46,22 | -13,98 | -14,27 | 3,8  | 0.00 | 42.85 | 92.28  | 360.18 | 586.64 | 0.2303 |
| Simeprevir | Main Protease | Autodock Vina | -8.6 |        |        |        |      | 1.97 | 21.77 | 85.44  | 306.13 | 581.69 | 0.1843 |
| Tipranavir | Main Protease | DockThor      |      | 36977  | -6915  |        |      | 1.17 | 9.30  | 18.10  | 127.53 | 425.93 | 0.0643 |
| Tipranavir | Main Protease | PatchDock     |      | -45,96 | -17,36 | -12,06 | 4,07 | 0.00 | 0.13  | 9.24   | 106.14 | 468.67 | 0.02   |
| Tipranavir | Main Protease | Autodock Vina | -6.9 |        |        |        |      | 0.10 | 83.04 | 4.18   | 252.65 | 443.04 | 0.1969 |
| Veruprevir | Main Protease | DockThor      |      | 51976  | -21735 |        |      | 0.43 | 25.00 | 51.77  | 179.49 | 580.12 | 0.1323 |
| Veruprevir | Main Protease | PatchDock     |      | -47,04 | -15,48 | -12,7  | 6,58 | 0.00 | 16.27 | 81.14  | 296.20 | 578.48 | 0.1684 |
| Veruprevir | Main Protease | Autodock Vina | -8.0 |        |        |        |      | 0.45 | 13.99 | 89.94  | 268.73 | 564.75 | 0.184  |
| Abacavir   | Polymerase    | DockThor      |      | -25545 | -14361 |        |      | 1.38 | 0.06  | 101.45 | 143.67 | 283.53 | 0.358  |
| Abacavir   | Polymerase    | PatchDock     |      | -46,93 | -10,22 | -15,93 | 1,44 | 1.39 | 0.00  | 141.39 | 221.96 | 275.05 | 0.5141 |
| Abacavir   | Polymerase    | Autodock Vina | -5.8 |        |        |        |      | 0.97 | 3.99  | 133.67 | 175.82 | 268.80 | 0.5121 |
| Adefovir   | Polymerase    | DockThor      |      | -30543 | 0.416  |        |      | 3.77 | 0.00  | 128.16 | 128.35 | 218.04 | 0.5878 |
| Adefovir   | Polymerase    | PatchDock     |      | -31,66 | -9,15  | -10,23 | 1,22 | 0.83 | 3.04  | 127.09 | 195.31 | 231.58 | 0.5619 |
| Adefovir   | Polymerase    | Autodock Vina | -5.3 |        |        |        |      | 1.92 | 0.00  | 165.63 | 172.34 | 233.73 | 0.7086 |
| Didanosine | Polymerase    | DockThor      |      | -12248 | -4609  |        |      | 1.56 | 0.00  | 91.33  | 99.87  | 205.19 | 0.4451 |
| Didanosine | Polymerase    | PatchDock     |      | -33    | -12,94 | -8     | 0,7  | 1.84 | 40.44 | 64.11  | 178.10 | 195.95 | 0.5336 |

|                      |                       |               |      |        |        |        |      |      |        |        |        |        |        |
|----------------------|-----------------------|---------------|------|--------|--------|--------|------|------|--------|--------|--------|--------|--------|
| Didanosine           | Polymerase            | Autodock Vina | -6.2 |        |        |        |      | 1.03 | 28.61  | 67.02  | 150.50 | 200.19 | 0.4777 |
| Efavirenz            | Polymerase            | DockThor      |      | -7939  | -12629 |        |      | 1.28 | 0.00   | 0.00   | 103.42 | 235.63 | 0      |
| Efavirenz            | Polymerase            | PatchDock     |      | -32,71 | -9,62  | -9,52  | 1,35 | 0.00 | 5.19   | 0.00   | 182.91 | 227.40 | 0.0228 |
| Efavirenz            | Polymerase            | Autodock Vina | -7.6 |        |        |        |      | 0.96 | 128.04 | 0.00   | 157.34 | 226.51 | 0.5653 |
| Emtricitabine        | Polymerase            | DockThor      |      | -21244 | -10348 |        |      | 1.91 | 0.00   | 62.91  | 109.37 | 197.08 | 0.3192 |
| Emtricitabine        | Polymerase            | PatchDock     |      | -34,96 | -10,54 | -10,04 | 0,65 | 0.90 | 68.16  | 26.52  | 178.22 | 190.75 | 0.4964 |
| Emtricitabine        | Polymerase            | Autodock Vina | -5.9 |        |        |        |      | 1.12 | 0.19   | 67.66  | 130.25 | 196.46 | 0.3454 |
| Entecavir            | Polymerase            | DockThor      |      | -26527 | -7639  |        |      | 1.49 | 0.00   | 138.86 | 141.07 | 234.94 | 0.591  |
| Entecavir            | Polymerase            | PatchDock     |      | -37,89 | -13,86 | -10    | 1,56 | 2.52 | 50.19  | 85.57  | 214.36 | 232.46 | 0.584  |
| Entecavir            | Polymerase            | Autodock Vina | -6.4 |        |        |        |      | 0.88 | 9.37   | 96.77  | 163.22 | 243.22 | 0.4364 |
| Primaquine Phosphate | RBD                   | DockThor      |      | 5,996  | -2,13  |        |      | 1.62 | 0.00   | 53.16  | 103.29 | 274.87 | 0.1934 |
| Primaquine Phosphate | RBD                   | PatchDock     |      | -40,8  | -11,63 | -12,19 | 1,79 | 0.42 | 0.00   | 79.87  | 212.02 | 275.19 | 0.2902 |
| Primaquine Phosphate | RBD                   | Autodock Vina | -4,9 |        |        |        |      | 1.55 | 18.73  | 60.88  | 130.31 | 254.17 | 0.3132 |
| Primaquine Phosphate | Proteina Spike Open   | DockThor      |      | 10076  | -11274 |        |      | 0.98 | 12.21  | 101.83 | 172.40 | 273.35 | 0.4172 |
| Primaquine Phosphate | Proteina Spike Open   | PatchDock     |      | -40,2  | -7,38  | -14,29 | 0,31 | 0.34 | 65.19  | 88.35  | 248.86 | 279.75 | 0.5488 |
| Primaquine Phosphate | Proteina Spike Open   | Autodock Vina | -5,6 |        |        |        |      | 0.74 | 22.72  | 105.38 | 236.83 | 270.13 | 0.4742 |
| Primaquine Phosphate | Proteina Spike Closed | DockThor      |      | 6456   | -6755  |        |      | 1.96 | 20.89  | 79.05  | 135.12 | 277.02 | 0.3608 |
| Primaquine Phosphate | Proteina Spike Closed | PatchDock     |      | -39,75 | -13,54 | -10,76 | 0,06 | 2.15 | 48.23  | 97.28  | 239.55 | 278.99 | 0.5216 |
| Primaquine Phosphate | Proteina Spike Closed | Autodock Vina | -5,1 |        |        |        |      | 0.94 | 12.53  | 82.21  | 184.62 | 271.31 | 0.3492 |
| Galidesivir          | Polymerase            | DockThor      |      | -24508 | -9942  |        |      | 3.28 | 0.00   | 119.68 | 123.48 | 240.95 | 0.4967 |
| Galidesivir          | Polymerase            | PatchDock     |      | -36,69 | -11,65 | -10,64 | 0,32 | 2.44 | 1.14   | 159.81 | 199.36 | 233.67 | 0.6888 |
| Galidesivir          | Polymerase            | Autodock Vina | -6.1 |        |        |        |      | 3.24 | 0.00   | 141.39 | 142.21 | 239.93 | 0.5893 |
| Lamivudine           | Polymerase            | DockThor      |      | -30225 | -10335 |        |      | 1.88 | 0.00   | 68.73  | 114.74 | 195.00 | 0.3525 |
| Lamivudine           | Polymerase            | PatchDock     |      | -32,64 | -12,91 | -8,2   | 1,04 | 1.31 | 58.42  | 52.91  | 179.05 | 194.68 | 0.5719 |
| Lamivudine           | Polymerase            | Autodock Vina | -5.6 |        |        |        |      | 2.07 | 0.00   | 88.42  | 142.91 | 196.77 | 0.4494 |
| Nevirapine           | Polymerase            | DockThor      |      | 26809  | -11614 |        |      | 0.97 | 0.00   | 0.13   | 130.12 | 226.96 | 0.0006 |
| Nevirapine           | Polymerase            | PatchDock     |      | -41,42 | -11,78 | -11,37 | 0,51 | 0.53 | 73.48  | 0.13   | 192.97 | 218.61 | 0.3367 |
| Nevirapine           | Polymerase            | Autodock Vina | -7.5 |        |        |        |      | 0.91 | 11.90  | 0.06   | 179.49 | 222.02 | 0.0539 |
| Ribavirin            | Polymerase            | DockThor      |      | 0.834  | -2839  |        |      | 2.84 | 0.00   | 137.21 | 137.21 | 216.26 | 0.6345 |

|                  |                       |               |      |        |         |        |      |      |        |        |        |        |        |
|------------------|-----------------------|---------------|------|--------|---------|--------|------|------|--------|--------|--------|--------|--------|
| Ribavirin        | Polymerase            | PatchDock     |      | -37,9  | -11,8   | -11,89 | 0,31 | 3,79 | 0,00   | 171.64 | 188.41 | 211.89 | 0.81   |
| Ribavirin        | Polymerase            | Autodock Vina | -6.7 |        |         |        |      | 2.30 | 0.00   | 170.57 | 174.55 | 213.74 | 0.798  |
| Sofosbuvir       | Polymerase            | DockThor      |      | -34751 | -19244  |        |      | 2.23 | 17.28  | 91.77  | 211.52 | 440.68 | 0.2475 |
| Sofosbuvir       | Polymerase            | PatchDock     |      | -43,79 | -12,08  | -14,56 | 1,92 | 0,49 | 123.92 | 41.83  | 295.75 | 406.26 | 0.408  |
| Sofosbuvir       | Polymerase            | Autodock Vina | -7.8 |        |         |        |      | 1.14 | 105.57 | 37.72  | 309.80 | 416.50 | 0.344  |
| Stavudine        | Polymerase            | DockThor      |      | -30817 | -3685   |        |      | 1.78 | 0.00   | 26.65  | 93.80  | 196.64 | 0.1355 |
| Stavudine        | Polymerase            | PatchDock     |      | -31,42 | -12,11  | -7,48  | 0,65 | 0,08 | 70.00  | 3.48   | 166.33 | 184.05 | 0.3992 |
| Stavudine        | Polymerase            | Autodock Vina | -5,8 |        |         |        |      | 0.06 | 12.72  | 21.96  | 126.01 | 191.26 | 0.1813 |
| Quinine Sulphate | RBD                   | DockThor      |      | 42303  | -2260   |        |      | 1.67 | 4.49   | 55.00  | 82.91  | 290.44 | 0.2048 |
| Quinine Sulphate | RBD                   | PatchDock     |      | -41,86 | -16,03  | -10,89 | 0,73 | 1,09 | 47.59  | 54.24  | 230.31 | 300.94 | 0.3384 |
| Quinine Sulphate | RBD                   | Autodock Vina | -6,5 |        |         |        |      | 0.53 | 37.09  | 40.76  | 180.88 | 311.02 | 0.2503 |
| Quinine Sulphate | Proteina Spike Open   | DockThor      |      | 46,281 | -10,311 |        |      | 0.97 | 7.40   | 35.89  | 131.14 | 295.57 | 0.1465 |
| Quinine Sulphate | Proteina Spike Open   | PatchDock     |      | -49,12 | -11,58  | -16,83 | 0,07 | 0,00 | 10.57  | 57.40  | 247.46 | 301.89 | 0.2251 |
| Quinine Sulphate | Proteina Spike Open   | Autodock Vina | -6,9 |        |         |        |      | 0.92 | 26.77  | 53.48  | 207.59 | 299.42 | 0.268  |
| Quinine Sulphate | Proteina Spike Closed | DockThor      |      | 46,029 | -12,789 |        |      | 1.13 | 9.49   | 69.30  | 169.43 | 295.93 | 0.2662 |
| Quinine Sulphate | Proteina Spike Closed | PatchDock     |      | -47,53 | -18,61  | -11,53 | 0,39 | 1,26 | 0.76   | 71.90  | 245.44 | 301.71 | 0.2408 |
| Quinine Sulphate | Proteina Spike Closed | Autodock Vina | -7,1 |        |         |        |      | 0.98 | 43.42  | 56.96  | 222.78 | 299.74 | 0.3349 |
| Tenofovir        | Polymerase            | DockThor      |      | -23159 | 1468    |        |      | 0.93 | 0.00   | 100.50 | 112.53 | 241.77 | 0.4157 |
| Tenofovir        | Polymerase            | PatchDock     |      | -31,29 | -12,32  | -8,26  | 0,98 | 2,18 | 23.61  | 136.77 | 231.39 | 242.35 | 0.6618 |
| Tenofovir        | Polymerase            | Autodock Vina | -6.7 |        |         |        |      | 4.12 | 2.22   | 172.53 | 215.95 | 250.39 | 0.6979 |
| Zidovudin        | Polymerase            | DockThor      |      | -29704 | -8487   |        |      | 2.40 | 0.00   | 96.77  | 153.48 | 248.54 | 0.3894 |
| Zidovudin        | Polymerase            | PatchDock     |      | -35,72 | -10,98  | -12,14 | 1,67 | 1,61 | 10.95  | 77.66  | 208.03 | 238.11 | 0.3721 |
| Zidovudin        | Polymerase            | Autodock Vina | -6.4 |        |         |        |      | 0.79 | 57.34  | 85.57  | 211.83 | 247.21 | 0.5781 |
| Arbidol          | RBD                   | DockThor      |      | 18930  | -14403  |        |      | 0,02 | 10,51  | 41,45  | 167,85 | 362,34 | 0,1434 |
| Arbidol          | RBD                   | PatchDock     |      | -49,02 | -9,11   | -15,63 | 1,79 | 0,00 | 45.25  | 56.83  | 266.58 | 363.91 | 0.2805 |
| Arbidol          | RBD                   | Autodock Vina | -5   |        |         |        |      | 0,02 | 35,76  | 20,63  | 143,92 | 338,41 | 0,1666 |
| Arbidol          | Proteina Spike Open   | DockThor      |      | 14143  | -17751  |        |      | 1,49 | 10,51  | 69,37  | 205,82 | 354,75 | 0,2252 |
| Arbidol          | Proteina Spike Open   | PatchDock     |      | -51,06 | -10,85  | -19,18 | 0,82 | 0,00 | 90.31  | 62.21  | 323.22 | 370.12 | 0.4121 |

|             |                       |               |      |        |        |        |      |      |        |        |        |        |        |
|-------------|-----------------------|---------------|------|--------|--------|--------|------|------|--------|--------|--------|--------|--------|
| Arbidol     | Proteina Spike Open   | Autodock Vina | -6.2 |        |        |        |      | 0.00 | 24.56  | 68.80  | 223.10 | 350.32 | 0.2665 |
| Arbidol     | Proteina Spike Closed | DockThor      |      | 21629  | -14546 |        |      | 0,18 | 35,7   | 39,56  | 175,82 | 360,51 | 0,2088 |
| Arbidol     | Proteina Spike Closed | PatchDock     |      | -47,32 | -16,09 | -11,59 | 0,21 | 1.25 | 21.58  | 70.88  | 292.46 | 367.33 | 0.2517 |
| Arbidol     | Proteina Spike Closed | Autodock Vina | -6.2 |        |        |        |      | 0,91 | 66,45  | 38,67  | 247,78 | 358,92 | 0,2929 |
| Camostat    | Main Protease         | DockThor      |      | -11353 | -9902  |        |      | 2,17 | 0      | 86,9   | 142,85 | 366,84 | 0,2369 |
| Camostat    | Main Protease         | PatchDock     |      | -35,87 | -15,37 | -9,62  | 4,33 | 0.00 | 47.53  | 89.05  | 240.19 | 364.73 | 0.3745 |
| Camostat    | Main Protease         | Autodock Vina | -5.4 |        |        |        |      | 0,09 | 50,95  | 121,14 | 211,77 | 376,7  | 0,4568 |
| Crysin      | Main Protease         | DockThor      |      | 9523   | -13738 |        |      | 1,79 | 0,38   | 0      | 113,23 | 212,08 | 0,0018 |
| Crysin      | Main Protease         | PatchDock     |      | -40,36 | -15,13 | -10,96 | 0,68 | 0.30 | 42.47  | 0.00   | 172.28 | 208.67 | 0.2035 |
| Crysin      | Main Protease         | Autodock Vina | -6.8 |        |        |        |      | 0,57 | 29,37  | 0      | 169,05 | 220    | 0,1335 |
| Darunavir   | Main Protease         | DockThor      |      | -5143  | -17889 |        |      | 1.39 | 71.14  | 189.05 | 482.45 | 0.1503 | 0.0095 |
| Darunavir   | Main Protease         | PatchDock     |      | -51,33 | -16,88 | -16,47 | 3,5  | 0.34 | 37.97  | 111.33 | 356.51 | 501.19 | 0.2979 |
| Darunavir   | Main Protease         | Autodock Vina | -6.8 |        |        |        |      | 1,92 | 16,9   | 151,64 | 274,68 | 453,09 | 0,372  |
| Emodin      | RBD                   | DockThor      |      | 10500  | -10751 |        |      | 0,54 | 22,21  | 0      | 87,66  | 207,27 | 0,1072 |
| Emodin      | RBD                   | PatchDock     |      | -42,09 | -15,09 | -11,43 | 0,4  | 1.01 | 22.21  | 0.00   | 186.77 | 210.30 | 0.1056 |
| Emodin      | RBD                   | Autodock Vina | -6,2 |        |        |        |      | 1,38 | 0,19   | 0      | 128,67 | 219,81 | 0,0009 |
| Emodin      | Proteina Spike Open   | DockThor      |      | 2823   | -12643 |        |      | 0,33 | 11,58  | 0      | 145,57 | 206,32 | 0,0561 |
| Emodin      | Proteina Spike Open   | PatchDock     |      | -38,05 | -11,8  | -12,26 | 0,6  | 0.44 | 50.89  | 0.00   | 184.49 | 213.86 | 0.238  |
| Emodin      | Proteina Spike Open   | Autodock Vina | -7.0 |        |        |        |      | 1.15 | 20.82  | 0.00   | 132.21 | 213.10 | 0.0977 |
| Emodin      | Proteina Spike Closed | DockThor      |      | 8500   | -1507  |        |      | 0,1  | 22,66  | 0      | 96,07  | 209,49 | 0,1082 |
| Emodin      | Proteina Spike Closed | PatchDock     |      | -37,97 | -13,73 | -10,11 | 0,33 | 0.10 | 39.68  | 0.00   | 175.00 | 214.05 | 0.1854 |
| Emodin      | Proteina Spike Closed | Autodock Vina | -7.2 |        |        |        |      | 0,86 | 12,53  | 0      | 144,24 | 218,04 | 0,0575 |
| Favipiravir | Polymerase            | DockThor      |      | 22.029 | -9401  |        |      | 1,34 | 5,44   | 35,63  | 90,38  | 129,68 | 0,3167 |
| Favipiravir | Polymerase            | PatchDock     |      | -27,96 | -13,17 | -5,03  | 0,03 | 1.06 | 0.00   | 58.35  | 109.30 | 120.06 | 0.486  |
| Favipiravir | Polymerase            | Autodock Vina | -5.6 |        |        |        |      | 0,92 | 32,02  | 39,05  | 119,18 | 128,8  | 0,5518 |
| nFCCL3      | RBD                   | DockThor      |      | 31648  | -27093 |        |      | 0    | 85,63  | 0      | 209,68 | 396,13 | 0,2162 |
| nFCCL3      | RBD                   | PatchDock     |      | -51,5  | -17,26 | -13,34 | 0,25 | 0.01 | 64.24  | 0.00   | 284.11 | 386.64 | 0.1661 |
| nFCCL3      | RBD                   | Autodock Vina | -7,1 |        |        |        |      | 0    | 142,34 | 0      | 270,5  | 405,25 | 0,3512 |



|             |                       |               |      |        |        |        |      |      |        |        |        |        |        |
|-------------|-----------------------|---------------|------|--------|--------|--------|------|------|--------|--------|--------|--------|--------|
| nFCCL3      | Proteina Spike Open   | DockThor      |      | 32090  | -25925 |        |      | 0    | 45,63  | 0      | 194,81 | 397,02 | 0,1149 |
| nFCCL3      | Proteina Spike Open   | PatchDock     |      | -58,05 | -13,48 | -20,15 | 0,35 | 0,00 | 102,66 | 0,00   | 299,61 | 387,34 | 0,265  |
| nFCCL3      | Proteina Spike Open   | Autodock Vina | -7.3 |        |        |        |      | 0,00 | 75,06  | 0,00   | 276,89 | 392,96 | 0,191  |
| nFCCL3      | Proteina Spike Closed | DockThor      |      | 31288  | -20466 |        |      | 0,85 | 22,72  | 0      | 190,95 | 393,6  | 0,0577 |
| nFCCL3      | Proteina Spike Closed | PatchDock     |      | -49,11 | -19,82 | -9,79  | 0,48 | 0,06 | 120,12 | 0,00   | 299,05 | 386,25 | 0,311  |
| nFCCL3      | Proteina Spike Closed | Autodock Vina | -7.2 |        |        |        |      | 0,46 | 32,59  | 0      | 258,6  | 399,48 | 0,0816 |
| Nicosamide  | RBD                   | DockThor      |      | 12601  | -10555 |        |      | 1,13 | 20,19  |        | 116,07 | 228,73 | 0,0883 |
| Nicosamide  | RBD                   | PatchDock     |      | -39,21 | -15,62 | -10,21 | 3,57 | 0,98 | 94,49  | 0,63   | 185,00 | 216,77 | 0,4388 |
| Nicosamide  | RBD                   | Autodock Vina | -5,5 |        |        |        |      | 0    | 1,65   | 38,86  | 136,45 | 235,13 | 0,1723 |
| Nicosamide  | Proteina Spike Open   | DockThor      |      | 10895  | -13121 |        |      | 1,09 | 0,89   | 0      | 131,83 | 230,76 | 0,0039 |
| Nicosamide  | Proteina Spike Open   | PatchDock     |      | -47,37 | -13,79 | -15,33 | 0,22 | 0,01 | 0,00   | 0,00   | 135,88 | 192,08 | 0      |
| Nicosamide  | Proteina Spike Open   | Autodock Vina | -7.2 |        |        |        |      | 0,00 | 147,72 | 21,39  | 222,21 | 254,36 | 0,6648 |
| Nicosamide  | Proteina Spike Closed | DockThor      |      | 13859  | -5812  |        |      | 0,75 | 19,18  | 0      | 128,99 | 230,25 | 0,0833 |
| Nicosamide  | Proteina Spike Closed | PatchDock     |      | -41,44 | -16,79 | -9,48  | 0,63 | 1,31 | 53,29  | 0,19   | 195,76 | 218,15 | 0,2452 |
| Nicosamide  | Proteina Spike Closed | Autodock Vina | -6.8 |        |        |        |      | 3,24 | 8,73   | 49,56  | 164,49 | 241,51 | 0,2414 |
| Oseltamivir | RBD                   | DockThor      |      | -9030  | -4939  |        |      | 1,69 | 0      | 82,97  | 123,92 | 328,97 | 0,2522 |
| Oseltamivir | RBD                   | PatchDock     |      | -41,59 | -14,57 | -10,74 | 2,16 | 2,62 | 98,29  | 69,75  | 290,18 | 343,23 | 0,4896 |
| Oseltamivir | RBD                   | Autodock Vina | -5,9 |        |        |        |      | 0,94 | 57,34  | 78,1   | 208,22 | 332,59 | 0,4072 |
| Oseltamivir | Proteina Spike Open   | DockThor      |      | -11111 | -12487 |        |      | 2    | 16,52  | 79,49  | 167,91 | 328,02 | 0,2927 |
| Oseltamivir | Proteina Spike Open   | PatchDock     |      | -43,63 | -12,36 | -14,33 | 0,71 | 0,79 | 25,06  | 91,07  | 286,96 | 342,76 | 0,3388 |
| Oseltamivir | Proteina Spike Open   | Autodock Vina | -6.1 |        |        |        |      | 0,73 | 63,86  | 82,97  | 263,16 | 329,69 | 0,4454 |
| Oseltamivir | Proteina Spike Closed | DockThor      |      | -1884  | -11166 |        |      | 1,94 | 17,4   | 67,59  | 166,52 | 324,35 | 0,262  |
| Oseltamivir | Proteina Spike Closed | PatchDock     |      | -36,49 | -13,64 | -9,58  | 0,82 | 0,50 | 78,29  | 87,53  | 303,41 | 340,31 | 0,4873 |
| Oseltamivir | Proteina Spike Closed | Autodock Vina | -5.9 |        |        |        |      | 1,01 | 59,49  | 83,54  | 236,20 | 316,58 | 0,4518 |
| Ganciclovir | RBD                   | DockThor      |      | -54089 | 16220  |        |      | 1,28 | 0      | 133,86 | 134,3  | 326,64 | 0,4098 |
| Ganciclovir | RBD                   | PatchDock     |      | -32,39 | -16,33 | -4,09  | 2,4  | 3,56 | 0,00   | 226,58 | 297,59 | 321,20 | 0,7054 |

|                |                       |               |      |         |         |        |      |       |       |        |        |        |        |
|----------------|-----------------------|---------------|------|---------|---------|--------|------|-------|-------|--------|--------|--------|--------|
| Ganciclovir    | RBD                   | Autodock Vina | -6,3 |         |         |        |      | 3,33  | 0,00  | 164,74 | 183,22 | 320,18 | 0,5145 |
| Ganciclovir    | Proteina Spike Open   | DockThor      |      | -59019  | 22239   |        |      | 3,98  | 0     | 121,33 | 121,64 | 342,34 | 0,3544 |
| Ganciclovir    | Proteina Spike Open   | PatchDock     |      | -42,08  | -13,54  | -13,44 | 0,55 | 3,44  | 14,62 | 199,62 | 285,63 | 321,52 | 0,6663 |
| Ganciclovir    | Proteina Spike Open   | Autodock Vina | -6,8 |         |         |        |      | 1,95  | 1,84  | 198,60 | 238,48 | 317,01 | 0,6323 |
| Ganciclovir    | Proteina Spike Closed | DockThor      |      | -49996  | 0,613   |        |      | 2,9   | 0     | 130,5  | 147,15 | 33,8   | 0,391  |
| Ganciclovir    | Proteina Spike Closed | PatchDock     |      | -40,05  | -15,89  | -9,04  | 0,19 | 1,91  | 0,00  | 160,95 | 253,79 | 319,30 | 0,5041 |
| Ganciclovir    | Proteina Spike Closed | Autodock Vina | -7,9 |         |         |        |      | 3,56  | 0,00  | 172,91 | 282,59 | 311,89 | 0,5544 |
| Penciclovir    | Polymerase            |               |      | -33,11  | -8,7    | -11,23 | 0,41 | 11,93 | 0,125 | 0,35   | 0,51   | 147,53 | 192,78 |
| Penciclovir    | Polymerase            |               |      | -42,863 | -8,598  |        |      | 4,77  | 0,444 | 2,71   | 0,00   | 157,28 | 162,15 |
| Penciclovir    | Polymerase            |               | -5,6 |         |         |        |      | 4,64  | 0,5   | 2,40   | 0,00   | 134,68 | 135,88 |
| Phaitanthrin_D | RBD                   | DockThor      |      | 7869    | -13352  |        |      | 0,98  | 4,05  | 44,43  | 119,68 | 228,16 | 0,2125 |
| Phaitanthrin_D | RBD                   | PatchDock     |      | -48,72  | -18,36  | -12,97 | 0,23 | 0,00  | 26,01 | 73,54  | 186,90 | 231,76 | 0,4295 |
| Phaitanthrin_D | RBD                   | Autodock Vina | -8,2 |         |         |        |      | 0,56  | 20,13 | 86,64  | 140,63 | 231,83 | 0,4606 |
| Phaitanthrin_D | Proteina Spike Open   | DockThor      |      | 5442    | -16277  |        |      | 0,91  | 1,39  | 47,21  | 121,45 | 228,60 | 0,2126 |
| Phaitanthrin_D | Proteina Spike Open   | PatchDock     |      | -44,79  | -13,89  | -14,7  | 0,12 | 0,92  | 23,73 | 40,89  | 206,71 | 232,90 | 0,2775 |
| Phaitanthrin_D | Proteina Spike Open   | Autodock Vina | -7,9 |         |         |        |      | 0,79  | 11,90 | 75,63  | 175,06 | 233,93 | 0,3742 |
| Phaitanthrin_D | Proteina Spike Closed | DockThor      |      | 6372    | -18721  |        |      | 1,59  | 16,96 | 78,61  | 180,57 | 228,41 | 0,4184 |
| Phaitanthrin_D | Proteina Spike Closed | PatchDock     |      | -41,63  | -14,99  | -10,77 | 1,01 | 1,83  | 12,21 | 39,24  | 212,40 | 233,35 | 0,2205 |
| Phaitanthrin_D | Proteina Spike Closed | Autodock Vina | -8,2 |         |         |        |      | 0,85  | 8,48  | 77,15  | 178,92 | 230,44 | 0,3716 |
| Phaitanthrin_D | Main Protease         | DockThor      |      | 6269    | -20518  |        |      | 0,82  | 7,59  | 57,72  | 168,86 | 228,66 | 0,2856 |
| Phaitanthrin_D | Main Protease         | PatchDock     |      | -43,19  | -11,88  | -13,57 | 0,53 | 0,02  | 33,61 | 80,76  | 181,33 | 233,42 | 0,49   |
| Phaitanthrin_D | Main Protease         | Autodock Vina | -7,0 |         |         |        |      | 1,75  | 18,04 | 58,35  | 148,42 | 233,29 | 0,3274 |
| Phaitanthrin_D | Polymerase            | DockThor      |      | 6057    | -20704  |        |      | 0,01  | 3,54  | 87,47  | 152,15 | 227,27 | 0,4004 |
| Phaitanthrin_D | Polymerase            | PatchDock     |      | -47,73  | -18,57  | -11,57 | 0,48 | 0,94  | 12,59 | 48,10  | 218,92 | 231,33 | 0,2624 |
| Phaitanthrin_D | Polymerase            | Autodock Vina | -8,2 |         |         |        |      | 1,38  | 40,95 | 69,87  | 181,9  | 231,52 | 0,4787 |
| Phaitanthrin_D | NSP 10                | DockThor      |      | 7,021   | -16,473 |        |      | 0,98  | 13,42 | 59,94  | 121,71 | 227,15 | 0,323  |
| Phaitanthrin_D | NSP 10                | PatchDock     |      | -42,37  | -9,29   | -13,47 | 1,6  | 1,28  | 0,76  | 108,86 | 189,11 | 233,22 | 0,47   |
| Phaitanthrin_D | NSP 10                | Autodock Vina | -9,4 |         |         |        |      | 0     | 4,3   | 12,34  | 92,53  | 232,08 | 0,0717 |

|                |                       |               |      |        |         |        |      |      |       |        |        |        |        |
|----------------|-----------------------|---------------|------|--------|---------|--------|------|------|-------|--------|--------|--------|--------|
| Phaitanthrin_D | NSP 16                | DockThor      |      | 8,164  | -20,514 |        |      | 0,04 | 6,77  | 82,21  | 159,11 | 229,62 | 0,3875 |
| Phaitanthrin_D | NSP 16                | PatchDock     |      |        | -15,79  | -9,16  | 1,62 | 0,84 | 6,65  | 74,87  | 171,01 | 231,14 | 0,3527 |
| Phaitanthrin_D | NSP 16                | Autodock Vina | -8,4 |        |         |        |      | 0    | 0,51  | 59,75  | 124,05 | 232,27 | 0,2594 |
| Rendesvir      | Polymerase            | DockThor      |      | -26981 | -20979  |        |      | 1,62 | 46,45 | 98,92  | 225,95 | 541,58 | 0,2684 |
| Rendesvir      | Polymerase            | PatchDock     |      |        | -13,31  | -18,06 | 1,84 | 1,32 | 7,34  | 157,66 | 351,32 | 473,10 | 0,3488 |
| Rendesvir      | Polymerase            | Autodock Vina | -8,1 |        |         |        |      | 1,51 | 77,59 | 79,56  | 370,69 | 516,63 | 0,3042 |
| Ribavirin      | Polymerase            | DockThor      |      | 0,982  | -3282   |        |      | 2,32 | 0     | 137,4  | 137,4  | 216,32 | 0,6352 |
| Ribavirin      | Polymerase            | PatchDock     |      |        | -11,8   | -11,89 | 0,31 | 3,79 | 0,00  | 171,64 | 188,41 | 211,89 | 0,81   |
| Ribavirin      | Polymerase            | Autodock Vina | -6,7 |        |         |        |      | 4,29 | 0     | 166,39 | 169,62 | 218,67 | 0,7609 |
| Sovalvi        | RBD                   | DockThor      |      | -32695 | -17130  |        |      | 1,05 | 33,61 | 78,99  | 182,21 | 406,7  | 0,2769 |
| Sovalvi        | RBD                   | PatchDock     |      |        | -12,58  | -6,51  | 1,22 | 1,56 | 37,09 | 66,64  | 348,28 | 406,82 | 0,255  |
| Sovalvi        | RBD                   | Autodock Vina |      |        |         |        |      |      |       |        |        |        |        |
| Sovalvi        | Proteina Spike Open   | DockThor      |      | -34248 | -18440  |        |      | 2,12 | 0     | 81,58  | 163,16 | 430    | 0,1894 |
| Sovalvi        | Proteina Spike Open   | PatchDock     |      |        | -17,56  | -13,07 | 0,07 | 0,26 | 57,34 | 95,63  | 358,73 | 405,51 | 0,3772 |
| Sovalvi        | Proteina Spike Open   | Autodock Vina |      |        |         |        |      |      |       |        |        |        |        |
| Sovalvi        | Proteina Spike Closed | DockThor      |      | -32445 | -19246  |        |      | 2,08 | 1,52  | 49,24  | 228,22 | 407,59 | 0,1245 |
| Sovalvi        | Proteina Spike Closed | PatchDock     |      |        | #VALOR! | -11,19 | 0,16 | 1,64 | 53,80 | 60,51  | 369,36 | 408,42 | 0,2799 |
| Sovalvi        | Proteina Spike Closed | Autodock Vina |      |        |         |        |      |      |       |        |        |        |        |
| SSAA09E2       | RBD                   | DockThor      |      | 12089  | -6154   |        |      | 1,95 | 0     | 69,43  | 126,26 | 288,79 | 0,2404 |
| SSAA09E2       | RBD                   | PatchDock     |      |        | -15,61  | -11,14 | 1,12 | 0,67 | 15,51 | 104,37 | 236,26 | 280,83 | 0,4269 |
| SSAA09E2       | RBD                   | Autodock Vina | -6,8 |        |         |        |      | 1,37 | 2,34  | 89,37  | 192,15 | 296,83 | 0,309  |
| SSAA09E2       | Proteina Spike Open   | DockThor      |      | 12512  | -16127  |        |      | 1,75 | 36,01 | 98,54  | 190,5  | 291,83 | 0,4611 |
| SSAA09E2       | Proteina Spike Open   | PatchDock     |      |        | -14,37  | -15,69 | 0,28 | 0,98 | 19,05 | 109,93 | 242,08 | 278,91 | 0,4624 |
| SSAA09E2       | Proteina Spike Open   | Autodock Vina | -6,6 |        |         |        |      | 0,93 | 3,29  | 115,00 | 218,67 | 301,38 | 0,3925 |
| SSAA09E2       | Proteina Spike Closed | DockThor      |      | 11813  | -20100  |        |      | 0,96 | 9,62  | 144,05 | 222,4  | 290,88 | 0,5283 |
| SSAA09E2       | Proteina Spike Closed | PatchDock     |      |        | -17,03  | -9,75  | 0,18 | 0,32 | 22,21 | 129,43 | 236,26 | 280,68 | 0,5403 |
| SSAA09E2       | Proteina Spike Closed | Autodock Vina | -5,4 |        |         |        |      | 0,99 | 8,80  | 96,96  | 158,92 | 290,82 | 0,3637 |
| Umefenovir     | RBD                   | DockThor      |      | 18532  | -15090  |        |      | 1,77 | 27,47 | 37,34  | 158,86 | 350,38 | 0,185  |

|            |                       |               |      |       |        |        |      |      |        |       |        |        |        |
|------------|-----------------------|---------------|------|-------|--------|--------|------|------|--------|-------|--------|--------|--------|
| Umefenovir | RBD                   | PatchDock     |      |       | -9,11  | -15,63 | 1,79 | 0,00 | 45,25  | 56,83 | 266,58 | 363,91 | 0,2805 |
| Umefenovir | RBD                   | Autodock Vina | -6,5 |       |        |        |      | 0,85 | 110,88 | 28,92 | 204,43 | 351,69 | 0,3975 |
| Umefenovir | Proteina Spike Open   | DockThor      |      | 12884 | -16859 |        |      | 1,26 | 25,06  | 69,62 | 172,4  | 361,58 | 0,2619 |
| Umefenovir | Proteina Spike Open   | PatchDock     |      |       | -10,85 | -19,18 | 0,82 | 0,00 | 90,31  | 62,21 | 323,22 | 370,12 | 0,4121 |
| Umefenovir | Proteina Spike Open   | Autodock Vina | -5.1 |       |        |        |      | 1,44 | 13,61  | 48,61 | 170,82 | 347,91 | 0,1788 |
| Umefenovir | Proteina Spike Closed | DockThor      |      | 20361 | -16066 |        |      | 0,12 | 44,43  | 27,53 | 171,71 | 358,91 | 0,2005 |
| Umefenovir | Proteina Spike Closed | PatchDock     |      |       | -16,09 | -11,59 | 0,21 | 1,25 | 21,58  | 70,88 | 292,46 | 367,33 | 0,2517 |
| Umefenovir | Proteina Spike Closed | Autodock Vina | -5.6 |       |        |        |      | 0,40 | 68,16  | 0,44  | 243,86 | 358,48 | 0,1914 |
